# Supplementary material for: Intermetallic YIr2nanoparticles with negatively charged Ir active sites for catalytic hydrogenation of cyclohexanone to cyclohexanol
Source: Royal Society of Chemistry journal article supplement (doi:10.1039/d2cy00198e), 2022-01-01
Supplement: d2cy00198e1.pdf [file d2cy00198e1.pdf]

COMMUNICATION

## Electronic Supplementary Information

### Intermetallic YIr<sub>2</sub> Nanoparticles with Negatively Charged Ir Active Sites for Catalytic Hydrogenation of Cyclohexanone to Cyclohexanol

Yasukazu Kobayashi,<sup>\*a</sup> Shohei Tada<sup>b</sup>, Masaru Kondo<sup>b</sup>, Kakeru Fujiwara<sup>c</sup> and Hiroshi Mizoguchi<sup>d</sup>

<sup>a</sup> *Interdisciplinary Research Center for Catalytic Chemistry, National Institute of Advanced Industrial Science and Technology (AIST), 1-1-1 Higashi, Tsukuba, Ibaraki 305-8565, Japan.*

*E-mail: [yasu-kobayashi@aist.go.jp](mailto:yasu-kobayashi@aist.go.jp).*

<sup>b</sup> *Department of Materials Science and Engineering, Ibaraki University, 4-12-1 Nakanarusawacho, Hitachi, Ibaraki 316-8511, Japan.*

<sup>c</sup> *Department of Chemistry and Chemical Engineering, Yamagata University, 4-3-16 Jonan, Yonezawa-shi, Yamagata 992-8510, Japan.*

<sup>d</sup> *International Center for Materials Nanoarchitectonics (WPI-MANA), National Institute for Materials Science (NIMS), Tsukuba, Ibaraki 305-0044, Japan.*



**Fig. S1** XRD patterns of YIr<sub>2</sub>(Pre) and YRh(Pre).



Fig. S2 SEM images of  $\text{YIr}_2(\text{RDT})$ .



**Fig. S3** (a) SEM image and (b) the corresponding EDX spectrum at different positions of #1-#4 for  $\text{YIr}_2(\text{RDT})$ .



**Fig. S4** SEM-EDX of YIr<sub>2</sub>(RDT) at different positions of #5-#22.



Fig. S5 SEM-EDX of  $\text{YIr}_2(\text{RDT})$  at a position of #23.



**Fig. S6** TEM images of  $\text{YIr}_2(\text{RDT})$ .



**Fig. S7** TEM-EDX of YIr<sub>2</sub>(RDT) at different positions of #1-#30.



**Fig. S8** Particle size distribution on TEM images for YIr<sub>2</sub>(RDT).



**Fig. S9** SEM images of YRh(RDT).



**Fig. S10** (a) SEM images and (b) the EDX spectra at a position of #12 for YRh(RDT).



**Fig. S11** SEM-EDX of YRh(RDT) at different 3 positions.



**Fig. S12** TEM images of YRh(RDT).



**Fig. S13** TEM-EDX of YRh(RDT) at different positions of #1-#37.



**Fig. S14** TEM-EDX of YRh(RDT).



**Fig. S15** Particle size distribution on TEM images for YRh(RDT).

**Table S1** Summary of the molar ratios measured by SEM-/TEM-EDX for YIr<sub>2</sub>(RDT).

| Measurement | Position # | Molar ratio [mol%] |      |      | Average ratio [mol/mol] |
|-------------|------------|--------------------|------|------|-------------------------|
|             |            | Y                  | Ir   | O    |                         |
| SEM-EDX     | 1          | 10.9               | 37.8 | 51.3 | Ir/Y = 1.7/1            |
|             | 2          | 13.8               | 35.7 | 50.5 |                         |
|             | 3          | 14.9               | 40.7 | 44.4 |                         |
|             | 4          | 11.8               | 43.4 | 44.8 |                         |
|             | 5          | 33.0               | 40.4 | 23.7 |                         |
|             | 6          | 31.9               | 34.7 | 30.6 |                         |
|             | 7          | 31.9               | 38.5 | 26.6 |                         |
|             | 8          | 36.1               | 41.1 | 21.3 |                         |
|             | 9          | 31.8               | 36.0 | 28.4 |                         |
|             | 10         | 13.1               | 27.4 | 53.8 |                         |
|             | 11         | 25.1               | 35.1 | 35.9 |                         |
|             | 12         | 25.3               | 34.6 | 35.2 |                         |
|             | 13         | 25.6               | 38.4 | 32.2 |                         |
|             | 14         | 24.6               | 32.5 | 30.8 |                         |
|             | 15         | 33.0               | 33.0 | 30.4 |                         |
|             | 16         | 23.7               | 42.1 | 30.4 |                         |
|             | 17         | 24.6               | 36.8 | 35.8 |                         |
|             | 18         | 42.5               | 40.2 | 14.9 |                         |
|             | 19         | 21.1               | 30.3 | 43.9 |                         |
|             | 20         | 31.9               | 42.1 | 21.3 |                         |
|             | 21         | 24.5               | 35.6 | 34.9 |                         |
|             | 22         | 17.7               | 34.1 | 44.7 |                         |
| TEM-EDX     | 1          | 21.7               | 61.9 | 5.5  | Ir/Y = 3.2/1            |
|             | 2          | 25.5               | 66.4 | 2.9  |                         |
|             | 3          | 19.1               | 72.6 | 2.4  |                         |
|             | 4          | 19.7               | 71.1 | 2.2  |                         |
|             | 5          | 26.2               | 64.0 | 3.4  |                         |
|             | 6          | 12.2               | 75.5 | 3.4  |                         |
|             | 7          | 15.4               | 46.1 | 21.1 |                         |
|             | 8          | 17.0               | 44.4 | 23.0 |                         |
|             | 9          | 15.7               | 52.6 | 12.3 |                         |
|             | 10         | 18.6               | 51.1 | 15.4 |                         |
|             | 11         | 22.6               | 59.5 | 5.3  |                         |
|             | 12         | 6.2                | 28.7 | 45.7 |                         |
|             | 13         | 20.2               | 56.2 | 8.8  |                         |
|             | 14         | 20.3               | 53.9 | 10.5 |                         |
|             | 15         | 16.1               | 56.5 | 9.5  |                         |
|             | 16         | 19.5               | 46.0 | 14.4 |                         |
|             | 17         | 13.4               | 47.7 | 19.5 |                         |
|             | 18         | 14.8               | 50.9 | 17.1 |                         |
|             | 19         | 19.4               | 62.0 | 5.8  |                         |
|             | 20         | 19.6               | 59.1 | 5.6  |                         |
|             | 21         | 22.4               | 64.1 | 5.4  |                         |

|  |    |      |      |      |  |
|--|----|------|------|------|--|
|  | 22 | 26.7 | 65.4 | 1.9  |  |
|  | 23 | 14.2 | 53.5 | 15.5 |  |
|  | 24 | 18.0 | 54.4 | 11.4 |  |
|  | 25 | 16.1 | 53.6 | 11.2 |  |
|  | 26 | 17.2 | 48.7 | 16.0 |  |
|  | 27 | 20.7 | 48.2 | 17.8 |  |
|  | 28 | 15.7 | 47.2 | 23.7 |  |
|  | 29 | 17.5 | 50.1 | 19.1 |  |

**Table S2** Summary of the molar ratios measured by SEM-/TEM-EDX for YRh(RDT).

| Measurement | Position # |    | Molar ratio [mol%] |      |      | Average ratio [mol/mol] |
|-------------|------------|----|--------------------|------|------|-------------------------|
|             |            |    | Y                  | Rh   | O    |                         |
| SEM-EDX     | Rh-rich    | 1  | 17.7               | 12.4 | 69.9 | Rh/Y = 0.9/1            |
|             |            | 2  | 9.0                | 6.8  | 84.1 |                         |
|             |            | 3  | 14.7               | 11.6 | 73.7 |                         |
|             |            | 4  | 19.6               | 13.3 | 67.1 |                         |
|             |            | 5  | 8.7                | 9.3  | 82.0 |                         |
|             |            | 6  | 10.7               | 6.1  | 83.1 |                         |
|             |            | 7  | 7.5                | 16.4 | 76.1 |                         |
|             |            | 8  | 10.0               | 9.5  | 80.5 |                         |
|             | Y-rich     | 9  | 9.5                | 3.5  | 87.0 | Rh/Y = 0.3/1            |
|             |            | 10 | 12.9               | 1.0  | 86.1 |                         |
|             |            | 11 | 3.8                | 0.6  | 95.6 |                         |
|             |            | 12 | 14.5               | 7.3  | 78.2 |                         |
|             |            | 13 | 12.8               | 1.7  | 85.5 |                         |
| TEM-EDX     | Rh-rich    | 1  | 46.7               | 36.7 | 16.6 | Rh/Y = 0.9/1            |
|             |            | 2  | 51.9               | 38.1 | 9.9  |                         |
|             |            | 3  | 47.8               | 37.4 | 14.8 |                         |
|             |            | 4  | 49.2               | 22.2 | 28.6 |                         |
|             |            | 5  | 46.1               | 23.8 | 30.1 |                         |
|             |            | 6  | 54.5               | 31.4 | 14.1 |                         |
|             |            | 7  | 44.8               | 28.2 | 27.1 |                         |
|             |            | 8  | 50.7               | 42.2 | 7.1  |                         |
|             |            | 9  | 28.9               | 48.3 | 22.8 |                         |
|             |            | 10 | 56.4               | 30.8 | 12.8 |                         |
|             |            | 11 | 44.5               | 22.5 | 33.0 |                         |
|             |            | 12 | 24.3               | 45.3 | 30.4 |                         |
|             |            | 13 | 27.2               | 56.3 | 16.5 |                         |
|             | Y-rich     | 14 | 36.9               | 0.1  | 62.9 | Rh/Y = 0.005/1          |
|             |            | 15 | 40.1               | 0.2  | 59.8 |                         |
|             |            | 16 | 37.4               | 0.0  | 62.6 |                         |
|             |            | 17 | 40.7               | 0.3  | 59.0 |                         |
|             |            | 18 | 37.7               | 0.1  | 62.2 |                         |
|             |            | 19 | 34.3               | 0.0  | 65.7 |                         |
|             |            | 20 | 30.2               | 0.0  | 69.8 |                         |
|             |            | 21 | 71.1               | 2.4  | 26.6 |                         |
|             |            | 22 | 35.3               | 0.1  | 64.6 |                         |
|             |            | 23 | 36.8               | 0.5  | 62.7 |                         |
|             |            | 24 | 38.1               | 0.2  | 61.6 |                         |
|             |            | 25 | 35.0               | 0.2  | 64.8 |                         |
|             |            | 26 | 31.5               | 0.2  | 68.4 |                         |
|             |            | 27 | 19.8               | 0.1  | 80.1 |                         |
|             |            | 28 | 31.3               | 0.1  | 68.7 |                         |
|             |            | 29 | 37.6               | 0.2  | 62.2 |                         |
|             |            | 30 | 60.6               | 0.0  | 39.4 |                         |

|  |  |    |      |     |      |  |
|--|--|----|------|-----|------|--|
|  |  | 31 | 51.3 | 0.0 | 48.7 |  |
|  |  | 32 | 35.5 | 0.0 | 64.5 |  |
|  |  | 33 | 32.9 | 0.4 | 66.7 |  |
|  |  | 34 | 10.3 | 0.0 | 89.7 |  |
|  |  | 35 | 38.1 | 0.1 | 61.8 |  |
|  |  | 36 | 42.7 | 0.1 | 57.2 |  |
|  |  | 37 | 43.8 | 0.4 | 55.8 |  |



**Fig. S16** XPS spectra of YIr<sub>2</sub>(Pre) and YIr<sub>2</sub>(RDT) for C 1s, Y 3d and Ir 4f. The spectra were calibrated with peaks of C 1s at 285 eV.



**Table S3** Comparison of catalytic performance in C=O bond hydrogenation to alcohols.

| Catalyst                             | Substrate             | Reductant                        | Temperature [°C] | Time [h] | Yield of alcohol [%] | ref.      |
|--------------------------------------|-----------------------|----------------------------------|------------------|----------|----------------------|-----------|
| 3wt%Pt/C                             | cyclohexanone         | H <sub>2</sub> (0.1 MPa)         | room temperature | 16       | 27                   | This work |
| YIr <sub>2</sub> (RDT)               | cyclohexanone         | H <sub>2</sub> (0.1 MPa)         | room temperature | 16       | 10                   |           |
| Pre-reduced YIr <sub>2</sub> (RDT)   | cyclohexanone         | H <sub>2</sub> (0.1 MPa)         | room temperature | 16       | 4                    |           |
| 1wt%Ir/Y <sub>2</sub> O <sub>3</sub> | cyclohexanone         | H <sub>2</sub> (0.1 MPa)         | room temperature | 16       | <0.05                |           |
| 1wt%Ir/SiO <sub>2</sub>              | cyclohexanone         | H <sub>2</sub> (0.1 MPa)         | room temperature | 16       | 0                    |           |
| YRh(RDT)                             | cyclohexanone         | H <sub>2</sub> (0.1 MPa)         | room temperature | 16       | 0                    |           |
| Ir/C                                 | 4-methyl benzaldehyde | H <sub>2</sub> balloon (0.1 MPa) | 100              | 10       | 3                    | [1]       |
| Ir@CN                                | 4-methyl benzaldehyde | H <sub>2</sub> balloon (0.1 MPa) | 100              | 10       | 4                    |           |
| Pd/C                                 | 4-methyl benzaldehyde | H <sub>2</sub> balloon (0.1 MPa) | 100              | 10       | 40                   |           |

**Reference**

[1] Zhi Wang, Lei Huang, Longfei Geng, Rizhi Chen, Weihong Xing, Yong Wang and Jun Huang, *Catal. Lett.* 2015, **145**, 1008.
